# Supplementary material
Source: PubMed Central journal article supplement (PMC5434648)

**A**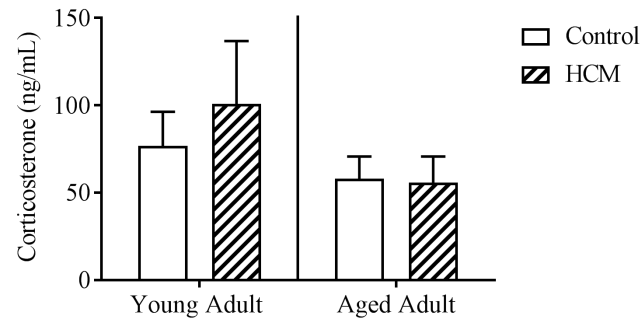**B**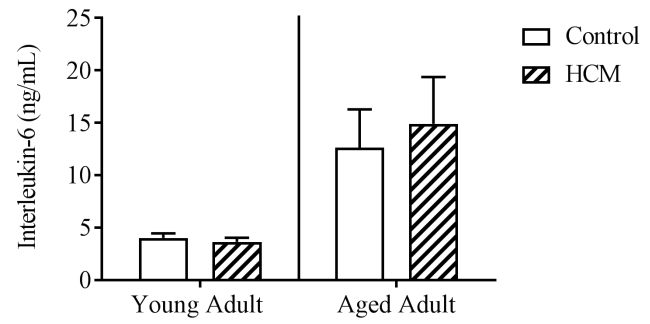

Supplement: supp_fj.201600955RR_Supplemental_Figure.pdf [file supp_fj.201600955RR_Supplemental_Figure.pdf]
